# Supplementary material for: Translational efficiency across healthy and tumor tissues is proliferation‐related
Source: PubMed Central journal article supplement (PMC7061310; doi:10.15252/msb.20199275), 2020-03-09
Supplement: MSB-16-e9275-s014.pdf [file MSB-16-e9275-s014.pdf]

## Translational efficiency across healthy and tumor tissues is proliferation-related

Xavier Hernandez-Alias, Hannah Benisty, Martin Schaefer and Luis Serrano.

---

|                         |                     |                                |
|-------------------------|---------------------|--------------------------------|
| <b>Review timeline:</b> | Submission date:    | 2 <sup>nd</sup> October 2019   |
|                         | Editorial Decision: | 19 <sup>th</sup> November 2019 |
|                         | Revision received:  | 13 <sup>th</sup> January 2020  |
|                         | Editorial Decision: | 6 <sup>th</sup> February 2020  |
|                         | Revision received:  | 11 <sup>th</sup> February 2020 |
|                         | Accepted:           | 11 <sup>th</sup> February 2020 |

---

Editor: Maria Polychronidou

### Transaction Report:

(Note: With the exception of the correction of typographical or spelling errors that could be a source of ambiguity, letters and reports are not edited. The original formatting of letters and referee reports may not be reflected in this compilation.)

1st Editorial Decision

19<sup>th</sup> November 2019

Thank you again for submitting your work to Molecular Systems Biology. We have now heard back from the three referees who agreed to evaluate your study. As you will see below, the reviewers acknowledge that the presented findings seem interesting. They raise however a series of concerns, which we would ask you to address in a major revision.

Without repeating all the points listed below, some of the more fundamental issues are the following:

- Reviewer #2 mentions that the effect of tRNA modifications and tRNA fragments on using small RNAs as a proxy for tRNAs needs to be examined further.
- Reviewer #3 mentions that further validations and better statistical support needs to be provided. They provide constructive suggestions in this regard.

All other issues raised by the reviewers would need to be convincingly addressed. Please feel free to contact me in case you would like to discuss in further detail any of the issues raised.

-----

### REFeree REPORTS

Reviewer #1:

In this paper in which Serrano and colleagues analyze the tRNA pool in diverse human tissues. They develop new measure of translation efficiency to show that across healthy and tumor tissues it is governed by proliferation. They show that aberrant translation efficiency of two codons ProCCA and GlyGGT in cancer, among other codons is associated with poor patient survival.

I learned a lot and enjoyed very much reading this paper. The analyses of state of the art, performed with rigor and accuracy. The findings are novel and exciting. They provide the strongest indication thus far from the role of proliferation state of tissues in governing their tRNA pool and translation efficiency. The implications onto cancer, in terms of prognosis and in terms of basic biology of translation are novel and illuminating too. Methods are executed with accuracy and suitability. I do not think the paper is very well written, my comments are minor as I'd mainly require clarifications along the following lines:

1. Figure 1B reports Spearman correlation. I think they should report side by side the Pearson correlations as well
2. The report on tRNA modification is a little odd (Fig. 1C) - all we are told is the number of modifications in each sample, nothing about their nature - which modifications are detected, what's the method of detection and quantification of a modification. This is a missed opportunity to convey important information to the reader.
3. The authors report "significant tissue-specificity for all 46 annotated anticodons" - but it's unclear what is the computation method to quantify such "tissue specificity", and how p-value is computed.
4. I don't understand the drawing and method of color coding of Fig 2A...
5. Please define exactly the matrix upon which the PCA is Fig 2B is done.
6. I'm not entirely sure how the "proliferative state of a tissue" is defined, computed or measured.
7. In Fig. 3A I think Pearson correlation will be more appropriate. In fact I'd also appreciate scatter plots that show how well protein quantification and protein to mRNA correlate with tAI, RTE and RtAI
8. The promoter methylation analysis is intriguing, but please clarify - is this CpG methylation or methylation of histones? (I guess the former, but the later was show to play a role too).

Reviewer #2:

This work uses the TCGA data to analyze the correlation of tRNA-mRNA expression (anticodon-codon), addressing an important question in the translation field. The authors first try to establish the concept that small RNA-seq results may be used as proxies for tRNA expression. This conceptual establishment is necessary because only small RNA-seq data, but no tRNA-seq data is available in TCGA. The idea of using small RNA-seq result to infer tRNA expression has been previously reported (Zhang et al., 2018, 2019). The author's new addition to this idea is to directly compare small RNA-seq with hydro-tRNA-seq results from the same cell lines which nicely go beyond the published work. The analysis of the TCGA data identified proliferation as a primary driver of tRNA-mRNA expression, and two specific codons that have large effects on survival.

Major comments:

1. The cell type dependent distribution and functional importance of tRNA fragments are only mentioned in passing, and completely ignored. tRNA fragments are part of the small RNA group and naturally produced for multiple known functions independent of translation. This omission makes the use of small RNA result as proxy of tRNA expression difficult to evaluate. For example, it is known that full tRNA tend to have higher levels of modifications. Would separating the small RNA result according to the extent of modifications (at least for those detectable by sequencing) makes a significant difference in using small RNA-seq as proxy of tRNA expression?
2. Fig. 1 and p. 17 small RNA sequencing protocol: I do not understand how the reported procedure would produce a substantial amount of small RNA reads. Typically small RNA-seq first goes through a size selection step to enrich true biological small RNAs which apparently was not done here.
3. Fig. 1B: the meaning of "significance" is unclear. This crucial data has a y-axis range from 0.90-0.96, which could be interpreted as no difference.
4. There is no raw seq-data presentation (e.g. IGV-like graphs) for comparing small RNA-seq and hydro-tRNA-seq results, making it difficult to evaluate the quality of the seq-data.

Minor comments:

1. For TCGA data, it is misleading to always refer the analysis as tRNA expression. At best the authors used a proxy parameter to infer tRNA abundance. This needs to be made clear throughout.
2. p.12, top: ProCCA is more likely decoded by tRNA<sup>TGG</sup>, not by tRNA<sup>AAG</sup>. More explanation is needed on why the authors focus on the analysis of tRNA<sup>AAG</sup>.

Reviewer #3:

This manuscript quantifies tRNA from small RNA sequencing data, collected without specific measures to capture tRNAs, through the TCGA consortium. These small RNA samples provide a large compendium of small RNA sequencing data, taken from healthy tissues as well as cancer cells. The tRNA levels quantified in different tissues vary substantially, and one dimension of cell-to-cell variation in tRNA abundance correlated with relative expression of Ki67, a marker of proliferation, and more generally with proliferation-related genes. These tRNA levels are used to compute the match between tRNA supply and demand, the latter determined by codon usage in the abundance-weighted transcriptome. Profiles of these supply-versus-demand ratios also cluster by tissue, and correlate with proliferation. This same analysis is applied to tumor samples, where specific codons are seen to shift in the tumor relative to healthy tissue. Within tumors, the "tumor-like" tRNA bias is associated with worse prognosis than the "healthy-like" tRNA bias. Increased tRNA abundance correlates with increased tRNA copy number and reduced promoter methylation.

The impact of changing tRNA pools on cell physiology is an important open question, and our understanding is limited by the lack of large-scale tRNA abundance measurements. Measurement of tRNA abundance from small RNA sequencing data offers a promising solution to this problem, already explored to some extent in the Zhang et al. manuscripts. One key innovation in the present manuscript is an improved mapping approach for tRNAs, which presents a substantial technical challenge. The importance of this innovation for accurate tRNA measurements and its ability to resolve cell-type-specific tRNA differences is not fully validated, however, and I also have concerns about some of the statistical analyses carried out using these measurements. These concerns limit the potential impact of this work.

1. The comparison between the mapping approach proposed here and in Zhang et al. 2018 is presented as simple numerical correlation coefficients in a table. It seems valuable to present these data as actual scatter plots that would demonstrate the dynamic range and other properties of these measurements.
2. It is argued from Figure 1B that the method here captures between cell type tRNA abundance differences. However, in many cases, the distributions of "mismatch vs match" correlations encompass a range that can be substantially higher than the "match" correlation. This seems to raise serious concerns about the ability to capture cell-type-specific tRNA profiles.
3. The manuscript defines a measure of codon demand-to-supply and describes it as a "relative translation efficiency". The term "translation efficiency" has another, specific meaning in this field its use here to describe this tRNA ratio may confuse readers into thinking that it reflects something about ribosome occupancy on the mRNA -- or even that this demand-vs-supply ratio drives this difference. At best, there is a very modest correlation (Figure 2A) with very weak predictive power from which no causal inference may be drawn.
4. This "RTEw" measurement is used substantially through the paper, but it is never tested whether "RTEw" (which includes sample-specific tRNA demand) outperforms simple tRNA abundance.
5. The correlation between promoter methylation and tRNA abundance is interpreted to reflect a causal link, but these could both arise as distinct consequences of some other, underlying cause that reduces tRNA expression and permits or promotes methylation too.

**POINT-BY-POINT RESPONSE TO REFEREES****Reviewer #1:**

*In this paper in which Serrano and colleagues analyze the tRNA pool in diverse human tissues. They develop new measures of translation efficiency to show that across healthy and tumor tissues it is governed by proliferation. They show that aberrant translation efficiency of two codons ProCCA and GlyGGT in cancer, among other codons is associated with poor patient survival.*

*I learned a lot and enjoyed very much reading this paper. The analyses of state of the art, performed with rigor and accuracy. The findings are novel and exciting. They provide the strongest indication thus far from the role of proliferation state of tissues in governing their tRNA pool and translation efficiency. The implications onto cancer, in terms of prognosis and in terms of basic biology of translation are novel and illuminating too. Methods are executed with accuracy and suitability.*

We thank the reviewer for appreciating the novelty and potential implications of the manuscript findings, as well as the appropriateness of the methods.

*I do not think the paper is very well written, my comments are minor as I'd mainly require clarifications along the following lines:*

- 1. Figure 1B reports Spearman correlation. I think they should report side by side the Pearson correlations as well*

Although we agree that Pearson correlation is commonly used to establish linear relations between variables, it is nevertheless poorly suited for non-normal distributions with outliers. In Fig R1, we show that tRNA abundances have indeed a long-tail distribution, since few tRNA account for most of the reads while most tRNA are lowly expressed. To circumvent this problem, we tried applying different transformations (logarithmic, square-root), but the resulting correlations are highly transformation-dependent and still biased towards a few highly expressed isoacceptors. For this reason, we used Spearman correlation, which does not assume any specific underlying distribution of the data, in the main text of the original version of the manuscript and prefer to not add a comparison with Pearson correlation in the revised version. Instead,

and in concordance with Fig 1B, we further show cell-line differences with a correlation-independent method. First, in order to assess the amount of tRNA variability coming from either the sequencing method or the cell lines, a Principal Component Analysis of these tRNA quantifications indicates that both factors influence variability to a similar extent (Fig EV1B, >30% variance each). Furthermore, to validate that small RNA-seq is similarly informative of cell type differences as Hydro-tRNAseq, we show that a Linear Discriminant Analysis of the data is able to discriminate between cell lines regardless of the sequencing protocol (Fig EV1B). We hope that this additional analysis will eliminate any doubts regarding the use of small RNA-seq data in detecting cell-line-specific tRNA profiles.

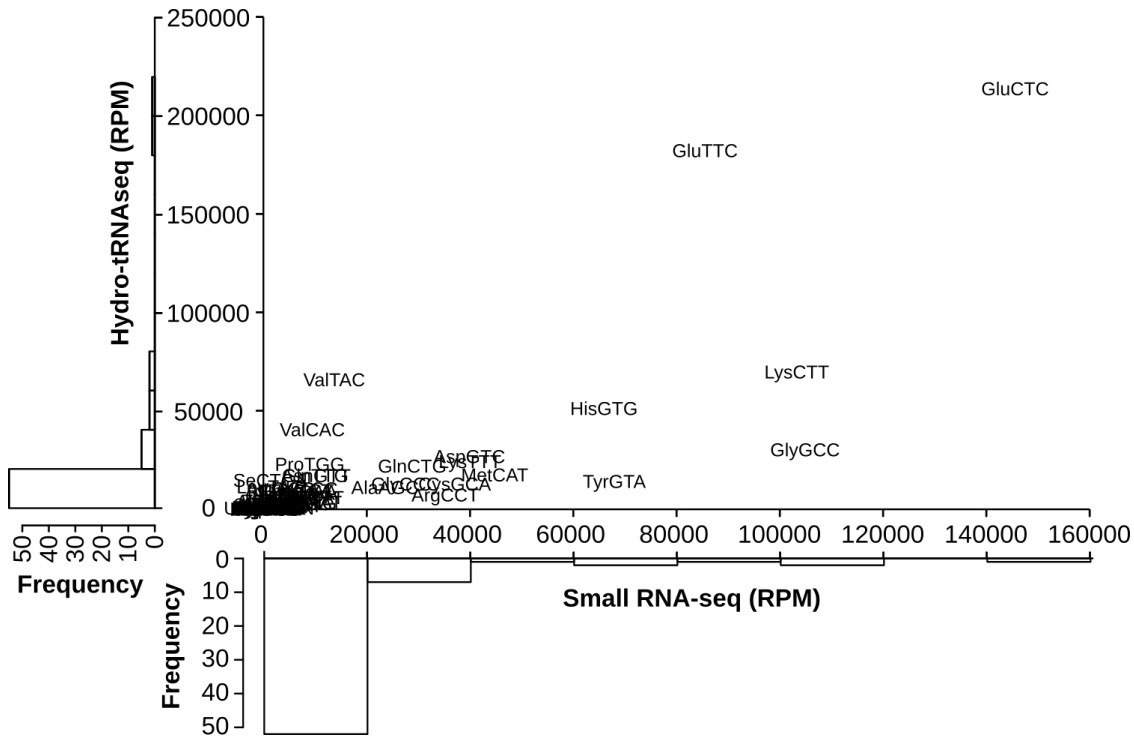

**Figure R1. Scatter plot of the absolute tRNA quantifications of HEK293 from small RNA-seq and Hydro-tRNAseq data.** The average Reads Per Million (RPM) among the triplicates are plotted, as well as the histogram distribution of all isoacceptors along each axis.

2. *The report on tRNA modification is a little odd (Fig. 1C) - all we are told is the number of modifications in each sample, nothing about their nature - which modifications are detected, what's the method of detection and quantification of a modification. This is a missed opportunity to convey important information to the reader.*

We agree with the reviewer that a deeper look at the nature and patterns of tRNA modifications will emphasize the message of concordance between small RNA-seq and Hydro-tRNAseq data. Modifications had already been determined by modification site calling, as described in the Methods section. We therefore mapped our tRNA library to the human-annotated consensus tRNA structure described in tRNAdb (Jühling *et al*, 2009). From there, the modification patterns of all cell lines and for both sequencing methods were determined position-by-position (Table EV3). In the case of HEK293, the modification pattern of small RNA-seq and Hydro-tRNAseq, as well as their concordances, have been depicted on an illustrative tRNA model in Fig EV3. As now specified in the main text [1<sup>st</sup> Results section, 3<sup>rd</sup> paragraph], although the exact nature of modifications cannot be directly determined from sequencing, the most abundant mismatch patterns are in agreement with known tRNA modifications such as adenosine-to-inosine editing and 1-methylinosine. As compared in Table EV3, most known mismatch-producing modifications could be

retrieved by both small RNA-seq and Hydro-tRNAseq. We hope these additional figure and dataset provide the reader with sufficient information regarding the nature and quantification of tRNA modifications, as well as the limitations of the method.

3. *The authors report "significant tissue-specificity for all 46 annotated anticodons" - but it's unclear what is the computation method to quantify such "tissue specificity", and how p-value is computed.*

We have rewritten the sentence to clarify the method and outcomes of this analysis [2<sup>nd</sup> Results section, 1<sup>st</sup> paragraph]. Now it reads: "For all 46 annotated anticodons, tRNA abundances have significant differences between tissues, as detected by Kruskal-Wallis test ( $q < 0.05$ , FDR-corrected)".

4. *I don't understand the drawing and method of color coding of Fig 2A...*

We apologize for not having included a clearer color legend in this figure (as well as in Fig 2B and Fig 3B). We have updated these figures to make the color code clearer.

5. *Please define exactly the matrix upon which the PCA is Fig 2B is done.*

We have included a clearer reference towards the data that was used in Fig 2B [2<sup>nd</sup> Results section, 2<sup>nd</sup> paragraph]. Now it reads (changes in italics): "Regarding codon usage, a measure of tRNA abundance taking into account the relative contribution of each tRNA anticodon among the set of *synonymous* codons of a certain amino acid is the Relative Anticodon Abundance (*see Methods*). *Using this measure*, a principal component analysis (PCA) of *all* healthy control samples in TCGA also shows clear differences between tissues (Fig 2B)".

6. *I'm not entirely sure how the "proliferative state of a tissue" is defined, computed or measured.*

We have slightly rearranged the paragraph on the proliferative state of tissues [2<sup>nd</sup> Results section, 2<sup>nd</sup> paragraph] in order to clarify the two approaches we use to measure this association. In the revised version, we now (1) introduce the GSEA pointing to proliferation, and (2) validate this link by correlation with Ki67. In addition, we have also better delimited our claims in the last paragraph of this section (changes in italics): "Furthermore, *based on both the gene set enrichment and the association to a proliferation marker*, our analyses identify the proliferative state of tissues as the major biological function driving the variability on tRNA abundances".

7. *In Fig. 3A I think Pearson correlation will be more appropriate. In fact I'd also appreciate scatter plots that show how well protein quantification and protein to mRNA correlate with tAI, RTE and RtAI*

We think that a Pearson correlation would have been appropriate to compare protein quantification to tAI, RTE and RtAI, as proteome abundance is normally distributed and linearly associated. However, regarding the protein-to-mRNA ratios, given the heavy-tailed distribution of quotients, it results in having few outliers biasing the whole Pearson correlation. In consequence, we decided to take Spearman correlations in the main text of the original article, as it does not assume any specific underlying distribution of the data. However, in order to clearly show the data distribution that justifies the method of choice, while at the same time reporting Pearson correlation in parallel whenever possible, as suggested by the reviewer, we have included two additional figures. On the one hand, Fig EV4A shows the raw scatter plots of one of the breast cancer samples, together with the corresponding linear regression wherever a Pearson correlation is suited. On the other, in Fig EV4B, the analogous Pearson analysis to Fig 3A contains the correlations of tAI, RTE

and RtAI against proteome abundances (but not against protein-to-mRNA ratios, for the reason explained above).

8. *The promoter methylation analysis is intriguing, but please clarify - is this CpG methylation or methylation of histones? (I guess the former, but the later was show to play a role too).*

It is indeed DNA methylation, which typically occurs at CpG dinucleotides. While we agree that it would be interesting to investigate the effect of histone methylation on tRNA expression, this data is not available for TCGA samples. To avoid confusion, we have clarified the type of studied methylation at the beginning of the section (changes in italics: "To determine the underlying mechanisms driving changes in expression, we retrieve the *DNA* methylation (*typically occurring at CpG dinucleotides*) and copy number alteration (CNA) data from TCGA samples, as a possible means for tRNA gene regulation").

#### **Reviewer #2:**

*This work uses the TCGA data to analyze the correlation of tRNA-mRNA expression (anticodon-codon), addressing an important question in the translation field. The authors first try to establish the concept that small RNA-seq results may be used as proxies for tRNA expression. This conceptual establishment is necessary because only small RNA-seq data, but no tRNA-seq data is available in TCGA. The idea of using small RNA-seq result to infer tRNA expression has been previously reported (Zhang et al., 2018, 2019). The author's new addition to this idea is to directly compare small RNA-seq with hydro-tRNA-seq results from the same cell lines which nicely go beyond the published work. The analysis of the TCGA data identified proliferation as a primary driver of tRNA-mRNA expression, and two specific codons that have large effects on survival.*

We thank the reviewer for acknowledging the novelty of the work.

*Major comments:*

1. *The cell type dependent distribution and functional importance of tRNA fragments are only mentioned in passing, and completely ignored. tRNA fragments are part of the small RNA group and naturally produced for multiple known functions independent of translation. This omission makes the use of small RNA result as proxy of tRNA expression difficult to evaluate. For example, it is known that full tRNA tend to have higher levels of modifications. Would separating the small RNA result according to the extent of modifications (at least for those detectable by sequencing) makes a significant difference in using small RNA-seq as proxy of tRNA expression?*

We are aware of the presence of tRNA-derived fragments (tRFs) in small RNA-seq datasets, and completely agree with the reviewer's concerns. In this context, we have made some changes and performed further analyses to address them:

- ❖ We studied the nature and patterns of detected tRNA modifications along the consensus tRNA structure. Modifications had already been determined by modification site calling, as described in the Methods section. We therefore mapped our tRNA library to the human-annotated consensus tRNA structure described in tRNAdb (Jühling *et al*, 2009). From there, the modification patterns of all cell lines and for both sequencing methods were determined position-by-position (Table

EV3). In the case of HEK293, the modification pattern of small RNA-seq and Hydro-tRNAseq, as well as their concordances, have been depicted on an illustrative tRNA model in Fig EV3.

- ❖ As suggested by the reviewer, we analyzed the correlation of small RNA-seq reads depending on the extent of modified/mismatched residues. Using HEK293 as the model cell line for this analysis, we divided small RNA-seq reads in four categories:
  - All reads (see Methods section): it includes all reads that can unambiguously be assigned to a certain isoacceptor, even though they are ambiguously mapped to several isodecoders.
  - Unique reads: reads that are unambiguously mapped to a certain isodecoder.
  - Matched reads: unique reads that do not contain mismatches.
  - Reads with mismatches: unique reads that contain mismatches.

As shown in Table R1, no significant differences between reads with or without mismatches are found when compared to tRNA-seq protocols in which tRFs are specifically removed before sequencing. In consequence, while we still cannot avoid having tRFs in our datasets, we can indeed prove they are not substantially biasing the quantification.

**Table R1. Spearman correlation of tRNA quantifications from small RNA-seq data against conventional tRNA-seq protocols.** The tRNA abundances from HEK293 were quantified in Reads Per Million (see Methods) and averaged among the triplicates. Different subsets of the small RNA-seq reads were compared to all other tRNA-seq datasets.

| Small RNA-seq<br>(this paper) | Hydro-tRNAseq<br>(this paper) | Hydro-tRNAseq<br>(Gogakos <i>et al</i> , 2017) | Hydro-tRNAseq<br>(Mattijssen <i>et al</i> , 2017) | DM-tRNAseq<br>(Zheng <i>et al</i> , 2015) |
|-------------------------------|-------------------------------|------------------------------------------------|---------------------------------------------------|-------------------------------------------|
| All reads                     | <b>0.94</b>                   | <b>0.85</b>                                    | <b>0.78</b>                                       | <b>0.80</b>                               |
| Unique reads                  | 0.83                          | 0.75                                           | 0.69                                              | 0.78                                      |
| Matched reads                 | 0.84                          | 0.76                                           | 0.70                                              | 0.79                                      |
| Reads with<br>mismatches      | 0.83                          | 0.72                                           | 0.65                                              | 0.75                                      |

- ❖ We now explicitly mention tRFs in the main text [1<sup>st</sup> Results section, 1<sup>st</sup> paragraph]: "It has been reported that there are tRNA-derived fragments naturally produced and having other functions different from translation (Schimmel, 2018), which could confound the tRNA quantification. Although we cannot exclude the presence of tRNA-derived fragments in small RNA-seq datasets (Torres et al, 2019), we found that no differences between reads with or without mismatches are found when compared to tRNA-seq protocols in which tRFs are specifically removed before sequencing".

Overall, all our analyses indicate that (1) there is no clear modification pattern related to small RNA-seq compared to mature tRNAs, and (2) small RNA-seq quantifications highly correlate with tRNA-seq protocols. We hope we could address the main concerns regarding tRFs, and appreciate the reviewer comment in order to clarify this issue in the main text.

2. *Fig. 1 and p. 17 small RNA sequencing protocol: I do not understand how the reported procedure would produce a substantial amount of small RNA reads. Typically small RNA-seq first goes through a size selection step to enrich true biological small RNAs which apparently was not done here.*

We thank the reviewer for bringing this point up, and apologize for the mistake in the original manuscript. There is indeed a size-selection step to enrich for small RNAs. We have corrected the Methods section, so it now reads (changes in italics): "Total RNA was directly adaptor-ligated, reverse-transcribed and



PCR-amplified for 12 cycles. *The resulting cDNA was then size-selected by gel electrophoresis, and fragments of 145-160 bp were eluted and sequenced on Illumina HiSeq 2500 platform in 50bp single-end format*".

3. *Fig. 1B: the meaning of "significance" is unclear. This crucial data has a y-axis range from 0.90-0.96, which could be interpreted as no difference.*

We agree that all correlations, even for mismatching pairs, are very high. However, in this paper, we want to emphasize that among the distribution of human tRNA abundances, different tissues and cell states showcase different profiles even if they differ just in a few isoacceptors. From this perspective, and in concordance with the reviewer, such small tRNA changes can often be diluted in a global correlation analysis as in Fig 1B. To better address this, we performed additional analyses to elucidate the amount of tRNA variability coming from either the sequencing method or the cell lines. First, a Principal Component Analysis of these tRNA quantifications indicates that both factors influence variability to a similar extent (Fig EV1B, >30% variance each). Furthermore, to validate that small RNA-seq is similarly informative of cell type differences as Hydro-tRNAseq, we show that a Linear Discriminant Analysis of the data is able to discriminate between cell lines regardless of the sequencing protocol (Fig EV1B). We hope that this additional evidence on cell-type-specific profiles will clarify the extent of tRNA differences.

4. *There is no raw seq-data presentation (e.g. IGV-like graphs) for comparing small RNA-seq and hydro-tRNA-seq results, making it difficult to evaluate the quality of the seq-data.*

In order to report the quality of our sequencing data (both small RNA-seq and Hydro-tRNAseq), we have included read length and coverage statistics in Fig EV2. In Fig EV2A, we plot the read length distribution in all cell lines in their triplicates. In Fig EV2B, we show, for each isoacceptor, the fraction of tRNA sequence that is covered by 1 or more reads. Finally, Fig EV2C contains the IGV-like graph of tRNAPro<sup>AGG</sup>, as one of the most studied tRNAs along the manuscript. We hope this supplementary figure can now guide the reader in evaluating and comparing the performance of our sequencing datasets.

*Minor comments:*

1. *For TCGA data, it is misleading to always refer the analysis as tRNA expression. At best the authors used a proxy parameter to infer tRNA abundance. This needs to be made clear throughout.*

As suggested by the reviewer, we tried to emphasize that all TCGA quantifications were determined from small RNA-seq data. In this context, we modified the main text [2<sup>nd</sup> Results section, 1<sup>st</sup> paragraph] as follows (changes in italics): "To determine the tissue-specificity of tRNAs in physiological conditions, the tRNA levels of all 675 healthy samples in TCGA tissues are analyzed *from small RNA-seq data*". In addition, we removed all references to our small RNA-seq quantifications as "tRNA expression" throughout the whole text, using "tRNA abundance", "tRNA quantification", "tRNA level", etc., instead. Finally, we also extended the Discussion to explicitly raise this point of debate [1<sup>st</sup> paragraph]: "All in all, even though our quantifications from small RNA-seq just give an estimate of the tRNA abundances, the results indicate that they can be rather precise proxies".

2. *p.12, top: ProCCA is more likely decoded by tRNATGG, not by tRNAAGG. More explanation is needed on why the authors focus on the analysis of tRNAAGG.*

We agree with the reviewer that the analysis of tRNAPro<sup>AGG</sup> instead of tRNAPro<sup>TGG</sup> in recognizing ProCCA deserved a better clarification. We have extended the Results section [5<sup>th</sup> Results section, 3<sup>rd</sup> paragraph] to explicitly discuss this rationale (changes in italics): "Given the association of the codon ProCCA with cancer prognosis (Fig 4C), we explore the *abundance* pattern of tRNAPro in TCGA. *While*

both tRNA<sup>Pro<sup>TGG</sup></sup> and tRNA<sup>Pro<sup>AGG</sup></sup> are able to decode ProCCA, the latter specifically appears overexpressed in 8 out of 9 cancer types (Fig EV5A), making it a candidate driver of the translational differences".

### Reviewer #3:

*This manuscript quantifies tRNA from small RNA sequencing data, collected without specific measures to capture tRNAs, through the TCGA consortium. These small RNA samples provide a large compendium of small RNA sequencing data, taken from healthy tissues as well as cancer cells. The tRNA levels quantified in different tissues vary substantially, and one dimension of cell-to-cell variation in tRNA abundance correlated with relative expression of Ki67, a marker of proliferation, and more generally with proliferation-related genes. These tRNA levels are used to compute the match between tRNA supply and demand, the latter determined by codon usage in the abundance-weighted transcriptome. Profiles of these supply-versus-demand ratios also cluster by tissue, and correlate with proliferation. This same analysis is applied to tumor samples, where specific codons are seen to shift in the tumor relative to healthy tissue. Within tumors, the "tumor-like" tRNA bias is associated with worse prognosis than the "healthy-like" tRNA bias. Increased tRNA abundance correlates with increased tRNA copy number and reduced promoter methylation.*

*The impact of changing tRNA pools on cell physiology is an important open question, and our understanding is limited by the lack of large-scale tRNA abundance measurements. Measurement of tRNA abundance from small RNA sequencing data offers a promising solution to this problem, already explored to some extent in the Zhang et al. manuscripts. One key innovation in the present manuscript is an improved mapping approach for tRNAs, which presents a substantial technical challenge. The importance of this innovation for accurate tRNA measurements and its ability to resolve cell-type-specific tRNA differences is not fully validated, however, and I also have concerns about some of the statistical analyses carried out using these measurements. These concerns limit the potential impact of this work.*

We thank the reviewer's comments in acknowledging the research niche of the manuscript and its approach. We are happy to address all concerns in order to strengthen the message and impact of the article.

- 1. The comparison between the mapping approach proposed here and in Zhang et al. 2018 is presented as simple numerical correlation coefficients in a table. It seems valuable to present these data as actual scatter plots that would demonstrate the dynamic range and other properties of these measurements.*

We did not include a deeper comparison between mapping approaches in the original submission, as the absolute tRNA quantifications from Zhang et al (2018) of HEK293 were not publicly available. Upon data request to the authors, we have now included a more accurate and complete correlation table (Table EV1). Furthermore, as suggested by the reviewer, we include the raw scatter plots corresponding to these correlations (Fig EV1A).

- 2. It is argued from Figure 1B that the method here captures between cell type tRNA abundance differences. However, in many cases, the distributions of "mismatch vs match" correlations encompass a range that can be substantially higher than the "match" correlation. This seems to raise serious concerns about the ability to capture cell-type-specific tRNA profiles.*

We agree that the correlation range of "mismatching" distributions is often large, and even sometimes overlapping with "matching" pairs. This is a consequence of the different sizes of each group, since "matching" distributions contain n=9 points while "mismatching" ones have n=63 points. Therefore, while the Wilcoxon rank-sum test is well suited for unequal sample sizes, it becomes also clear that, among all "mismatching" pairs, not all cell lines are equally distinct or similar to each other.

Furthermore, all correlations, even for mismatching pairs, are very high. In this context, we want to emphasize that among the distribution of human tRNA abundances, different tissues and cell states showcase different profiles even if they differ just in a few isoacceptors. From this perspective, and in concordance with the reviewer, such small tRNA changes can often be diluted in a global correlation analysis as in Fig 1B.

To tackle both issues raised above, we performed additional analyses to elucidate the amount of tRNA variability coming from either the sequencing method or the cell lines. First, a Principal Component Analysis of these tRNA quantifications indicates that both factors influence variability to a similar extent (Fig EV1B, >30% variance each). Furthermore, to validate that small RNA-seq is similarly informative of cell type differences as Hydro-tRNAseq, we show that a Linear Discriminant Analysis of the data is able to discriminate between cell lines regardless of the sequencing protocol (Fig EV1B). We hope that this additional evidence on cell-type-specific profiles will clarify the extent of tRNA differences.

- 3. The manuscript defines a measure of codon demand-to-supply and describes it as a "relative translation efficiency". The term "translation efficiency" has another, specific meaning in this field its use here to describe this tRNA ratio may confuse readers into thinking that it reflects something about ribosome occupancy on the mRNA -- or even that this demand-vs-supply ratio drives this difference. At best, there is a very modest correlation (Figure 2A) with very weak predictive power from which no causal inference may be drawn.*

We agree with the reviewer in that any effect of the supply-to-demand ratio in determining the process of translation is at most modest, as stated in the Results and Discussion sections. In order to emphasize this more clearly, we chose another name along the line of other terms alike (tAI, CAI). All references to the previous "RTE" have been modified to "Supply-to-Demand Adaptation" (SDA).

Furthermore, to clarify any mention to "translational efficiency", we have defined it the first time it appears [3<sup>rd</sup> Results section, 1<sup>st</sup> paragraph]: "The so-called translational efficiency is defined as the rate of protein production from mRNA, and multiple indices and models can be described to estimate it (Gingold & Pilpel, 2011). In this article . . .". With this introduction, we hope to make it clear to the reader that SDA is at most an estimator for translational efficiency, and not confounded with actual ribosome occupancy.

- 4. This "RTEw" measurement is used substantially through the paper, but it is never tested whether "RTEw" (which includes sample-specific tRNA demand) outperforms simple tRNA abundance.*

Before going into the core of the question, we would like to make a distinction between the concepts of "tRNA abundance" and "RTE" (now called SDA): while tRNA abundance refers to the levels of the 46 known tRNA isoacceptors, the SDA is a measure of adaptation of all 61 amino-acid-encoding codons (partially based on their cognate tRNA abundances). In this context, and following the line of discussion of the previous answer, we propose the SDA as an alternative to other metrics of tRNA-based codon adaptation, such as the tRNA Adaptation Index (tAI). As such, we believe the results in Fig 3A show how SDA performs compared to other measures alike. To highlight this more clearly, we have now added to the

main text [3<sup>rd</sup> Results section, 2<sup>nd</sup> paragraph]: "In consequence, including the mRNA codon demand into the SDA metric outperforms other tRNA-only metrics of translational efficiency".

5. *The correlation between promoter methylation and tRNA abundance is interpreted to reflect a causal link, but these could both arise as distinct consequences of some other, underlying cause that reduces tRNA expression and permits or promotes methylation too.*

We are aware that such a causal link cannot be established from the correlations and have therefore modified the Results section (changes in italics) [5<sup>th</sup> Results section, 3<sup>rd</sup> paragraph]: "Despite the limited explained variance of the models (average  $R^2=0.023$ ), such results *suggest* that promoter methylation *could contribute* to inhibition of tRNA gene expression, whereas an increase in the gene copy number *would enhance* tRNA expression". Similarly, we also revised the Discussion section (changes in italics): "In an effort to elucidate the mechanisms regulating the expression of tRNAs, we observe that the tRNA gene copy number and their DNA methylation state have a positive and inhibitory *association with tRNA abundances*, respectively. . . . Here we specifically propose a role for DNA methylation in regulating the overexpression of tRNA<sup>Pro</sup><sup>AGG</sup> in cancer, *although no direct causal link can yet be established*".

Thank you again for sending us your revised study. We have now heard back from the two referees who were asked to evaluate your study. As you will see below, the reviewers acknowledge that the performed revisions have addressed most of the previously raised issues. However, reviewer #3 still lists a couple of remaining concerns, which can be addressed by text modifications, and we would ask you to address in a minor revision.

---

## REFEREE REPORTS

Reviewer #2:

The authors have adequately addressed my comments.

Reviewer #3:

Revisions to the manuscript have addressed my specific concerns with the original version.

Broadly, I do think the extraction of tRNA reads from size-selected small RNA sequencing introduces the possibility of substantial artifacts. I had not appreciated that this was part of the small RNA sequencing workflow based on the original manuscript. We know that tRNA cleavage produces fragments that fall closer to the small RNA size range and could thus affect abundance in these sequencing data. Further, we know that tRNA cleavage is regulated and so differences in tRNA cleavage could masquerade as differences in tRNA abundance. The validation data presented in the manuscript don't address this point, and it would be very hard to do so comprehensively -- at a minimum, however this potential confounding effect needs to be discussed clearly.

As a minor point, I would suggest revising the abstract to read: "the codon-anticodon co-adaptation in humans is not completely understood, NOR IS its effect on tissue-specific protein levels."

**POINT-BY-POINT RESPONSE TO REFEREES****Reviewer #3:**

*Revisions to the manuscript have addressed my specific concerns with the original version.*

*Broadly, I do think the extraction of tRNA reads from size-selected small RNA sequencing introduces the possibility of substantial artifacts. I had not appreciated that this was part of the small RNA sequencing workflow based on the original manuscript. We know that tRNA cleavage produces fragments that fall closer to the small RNA size range and could thus affect abundance in these sequencing data. Further, we know that tRNA cleavage is regulated and so differences in tRNA cleavage could masquerade as differences in tRNA abundance. The validation data presented in the manuscript don't address this point, and it would be very hard to do so comprehensively -- at a minimum, however this potential confounding effect needs to be discussed clearly.*

We agree with the reviewer that this is an important point of discussion of the current article, and we do not intend to ignore the presence of tRNA cleavage in our dataset, nor its importance. In fact, aware of this potential artifact, we already tried to convey the existence of tRNA-derived fragments in the Results section of the previous version (1<sup>st</sup> section, 1<sup>st</sup> and 2<sup>nd</sup> paragraph) as well as in Figure EV1B.

In addition, to bring this point up again in the Discussion, we now explicitly mention the potential interference of tRNA-derived fragments [Discussion, 1<sup>st</sup> paragraph] (changes in italics): "As a result, we obtain reproducible and informative quantifications of all isoacceptors in our gold standard cell lines as well as in thousands of samples across 23 cancer types of TCGA, exceeding the quality of similarly published data (Zhang et al, 2018, 2019). *However, we cannot exclude that tRNA-derived fragments (tRFs) could be interfering with our small RNA-seq quantifications*".

*As a minor point, I would suggest revising the abstract to read: "the codon-anticodon co-adaptation in humans is not completely understood, NOR IS its effect on tissue-specific protein levels."*

We have incorporated the suggestion, and appreciate that it indeed clarifies the meaning of the sentence.

Accepted

11<sup>th</sup> February 2020

---

Thank you again for sending us your revised manuscript. We are now satisfied with the modifications made and I am pleased to inform you that your paper has been accepted for publication.

**YOU MUST COMPLETE ALL CELLS WITH A PINK BACKGROUND** ↓

PLEASE NOTE THAT THIS CHECKLIST WILL BE PUBLISHED ALONGSIDE YOUR PAPER

Corresponding Author Name: Luis Serrano and Martin Schaefer

Journal Submitted to: Molecular Systems Biology

Manuscript Number: MSB-19-9275

### Reporting Checklist For Life Sciences Articles (Rev. June 2017)

This checklist is used to ensure good reporting standards and to improve the reproducibility of published results. These guidelines are consistent with the Principles and Guidelines for Reporting Preclinical Research issued by the NIH in 2014. Please follow the journal's authorship guidelines in preparing your manuscript.

#### A- Figures

##### 1. Data

The data shown in figures should satisfy the following conditions:

- the data were obtained and processed according to the field's best practice and are presented to reflect the results of the experiments in an accurate and unbiased manner.
- figure panels include only data points, measurements or observations that can be compared to each other in a scientifically meaningful way.
- graphs include clearly labeled error bars for independent experiments and sample sizes. Unless justified, error bars should not be shown for technical replicates.
- if  $n < 5$ , the individual data points from each experiment should be plotted and any statistical test employed should be justified
- Source Data should be included to report the data underlying graphs. Please follow the guidelines set out in the author ship guidelines on Data Presentation.

##### 2. Captions

Each figure caption should contain the following information, for each panel where they are relevant:

- a specification of the experimental system investigated (eg cell line, species name).
- the assay(s) and method(s) used to carry out the reported observations and measurements
- an explicit mention of the biological and chemical entity(ies) that are being measured.
- an explicit mention of the biological and chemical entity(ies) that are altered/varied/perturbed in a controlled manner.
- the exact sample size (n) for each experimental group/condition, given as a number, not a range;
- a description of the sample collection allowing the reader to understand whether the samples represent technical or biological replicates (including how many animals, litters, cultures, etc.).
- a statement of how many times the experiment shown was independently replicated in the laboratory.
- definitions of statistical methods and measures:
  - common tests, such as t-test (please specify whether paired vs. unpaired), simple  $\chi^2$  tests, Wilcoxon and Mann-Whitney tests, can be unambiguously identified by name only, but more complex techniques should be described in the methods section;
  - are tests one-sided or two-sided?
  - are there adjustments for multiple comparisons?
  - exact statistical test results, e.g., P values = x but not P values < x;
  - definition of 'center values' as median or average;
  - definition of error bars as s.d. or s.e.m.

Any descriptions too long for the figure legend should be included in the methods section and/or with the source data.

In the pink boxes below, please ensure that the answers to the following questions are reported in the manuscript itself. Every question should be answered. If the question is not relevant to your research, please write NA (non applicable). We encourage you to include a specific subsection in the methods section for statistics, reagents, animal models and human subjects.

#### B- Statistics and general methods

Please fill out these boxes ↓ (Do not worry if you cannot see all your text once you press return)

|                                                                                                                                                                                         |                                                                                                                                                                                                                                      |
|-----------------------------------------------------------------------------------------------------------------------------------------------------------------------------------------|--------------------------------------------------------------------------------------------------------------------------------------------------------------------------------------------------------------------------------------|
| 1.a. How was the sample size chosen to ensure adequate power to detect a pre-specified effect size?                                                                                     | Sequencing experiments were all performed in triplicate to be able to assess their variability. Public TCGA data was downloaded and available sample sizes were specified.                                                           |
| 1.b. For animal studies, include a statement about sample size estimate even if no statistical methods were used.                                                                       | NA                                                                                                                                                                                                                                   |
| 2. Describe inclusion/exclusion criteria if samples or animals were excluded from the analysis. Were the criteria pre-established?                                                      | Hydro-tRNAseq quantifications of MDA-MB-231 cell line were excluded because of the abnormal variability of biological replicates. As it did not comply with our quality check, this sample was not included in any further analysis. |
| 3. Were any steps taken to minimize the effects of subjective bias when allocating animals/samples to treatment (e.g. randomization procedure)? If yes, please describe.                | NA                                                                                                                                                                                                                                   |
| For animal studies, include a statement about randomization even if no randomization was used.                                                                                          | NA                                                                                                                                                                                                                                   |
| 4.a. Were any steps taken to minimize the effects of subjective bias during group allocation or/and when assessing results (e.g. blinding of the investigator)? If yes please describe. | NA                                                                                                                                                                                                                                   |
| 4.b. For animal studies, include a statement about blinding even if no blinding was done                                                                                                | NA                                                                                                                                                                                                                                   |
| 5. For every figure, are statistical tests justified as appropriate?                                                                                                                    | Yes, Wilcoxon rank-sum test.                                                                                                                                                                                                         |
| Do the data meet the assumptions of the tests (e.g., normal distribution)? Describe any methods used to assess it.                                                                      | Yes, it is a non-parametric test.                                                                                                                                                                                                    |
| Is there an estimate of variation within each group of data?                                                                                                                            | Yes, both violin plots or box plots show the distribution of data points along the y axis.                                                                                                                                           |

#### USEFUL LINKS FOR COMPLETING THIS FORM

<http://www.antibodypedia.com>  
<http://idegreebio.org>  
<http://www.equator-network.org/reporting-guidelines/improving-bioscience-research-repor>  
  
<http://grants.nih.gov/grants/olaw/olaw.htm>  
<http://www.mrc.ac.uk/Ourresearch/Ethicsresearchguidance/Useofanimals/index.htm>  
<http://ClinicalTrials.gov>  
<http://www.consort-statement.org>  
<http://www.consort-statement.org/checklists/view/32-consort/66-title>  
  
<http://www.equator-network.org/reporting-guidelines/reporting-recommendations-for-turc>  
<http://datadryad.org>  
  
<http://figshare.com>  
  
<http://www.ncbi.nlm.nih.gov/gap>  
  
<http://www.ebi.ac.uk/ega>  
  
<http://biomodels.net/>  
  
<http://biomodels.net/miriam/>  
<http://jji.biochem.sun.ac.za>  
[http://oba.od.nih.gov/biosecurity/biosecurity\\_documents.html](http://oba.od.nih.gov/biosecurity/biosecurity_documents.html)  
<http://www.selectagents.gov/>



|                                                                                   |                                                                                                                 |
|-----------------------------------------------------------------------------------|-----------------------------------------------------------------------------------------------------------------|
| Is the variance similar between the groups that are being statistically compared? | Not necessary, but this assumption is not required for non-parametric tests such as the Wilcoxon rank-sum test. |
|-----------------------------------------------------------------------------------|-----------------------------------------------------------------------------------------------------------------|

### C- Reagents

|                                                                                                                                                                                                                                                                                                                              |                                                                                                                                                                                                 |
|------------------------------------------------------------------------------------------------------------------------------------------------------------------------------------------------------------------------------------------------------------------------------------------------------------------------------|-------------------------------------------------------------------------------------------------------------------------------------------------------------------------------------------------|
| 6. To show that antibodies were profiled for use in the system under study (assay and species), provide a citation, catalog number and/or clone number, supplementary information or reference to an antibody validation profile. e.g., Antibodypedia (see link list at top right), 1DegreeBio (see link list at top right). | NA                                                                                                                                                                                              |
| 7. Identify the source of cell lines and report if they were recently authenticated (e.g., by STR profiling) and tested for mycoplasma contamination.                                                                                                                                                                        | HeLa, HEK293, HCT116 and MDA-MB-231 were obtained from ATCC. BJ fibroblasts were a gift from Anders H. Lund laboratory (Disa Tehler). All cells lines were tested for mycoplasma contamination. |

\* for all hyperlinks, please see the table at the top right of the document

### D- Animal Models

|                                                                                                                                                                                                                                           |    |
|-------------------------------------------------------------------------------------------------------------------------------------------------------------------------------------------------------------------------------------------|----|
| 8. Report species, strain, gender, age of animals and genetic modification status where applicable. Please detail housing and husbandry conditions and the source of animals.                                                             | NA |
| 9. For experiments involving live vertebrates, include a statement of compliance with ethical regulations and identify the committee(s) approving the experiments.                                                                        | NA |
| 10. We recommend consulting the ARRIVE guidelines (see link list at top right) (PLoS Biol. 8(6), e1000412, 2010) to ensure that other relevant aspects of animal studies are adequately reported. See author guidelines, under 'Reporting | NA |

### E- Human Subjects

|                                                                                                                                                                                                                                                                                                                    |    |
|--------------------------------------------------------------------------------------------------------------------------------------------------------------------------------------------------------------------------------------------------------------------------------------------------------------------|----|
| 11. Identify the committee(s) approving the study protocol.                                                                                                                                                                                                                                                        | NA |
| 12. Include a statement confirming that informed consent was obtained from all subjects and that the experiments conformed to the principles set out in the WMA Declaration of Helsinki and the Department of Health and Human Services Belmont Report.                                                            | NA |
| 13. For publication of patient photos, include a statement confirming that consent to publish was obtained.                                                                                                                                                                                                        | NA |
| 14. Report any restrictions on the availability (and/or on the use) of human data or samples.                                                                                                                                                                                                                      | NA |
| 15. Report the clinical trial registration number (at ClinicalTrials.gov or equivalent), where applicable.                                                                                                                                                                                                         | NA |
| 16. For phase II and III randomized controlled trials, please refer to the CONSORT flow diagram (see link list at top right) and submit the CONSORT checklist (see link list at top right) with your submission. See author guidelines, under 'Reporting Guidelines'. Please confirm you have submitted this list. | NA |
| 17. For tumor marker prognostic studies, we recommend that you follow the REMARK reporting guidelines (see link list at top right). See author guidelines, under 'Reporting Guidelines'. Please confirm you have followed these guidelines.                                                                        | NA |

### F- Data Accessibility

|                                                                                                                                                                                                                                                                                                                                                                                                                                                                                                                                                                                                                                           |                                                                                                                                                                                                                                                                                                                                                                                                                             |
|-------------------------------------------------------------------------------------------------------------------------------------------------------------------------------------------------------------------------------------------------------------------------------------------------------------------------------------------------------------------------------------------------------------------------------------------------------------------------------------------------------------------------------------------------------------------------------------------------------------------------------------------|-----------------------------------------------------------------------------------------------------------------------------------------------------------------------------------------------------------------------------------------------------------------------------------------------------------------------------------------------------------------------------------------------------------------------------|
| 18: Provide a "Data Availability" section at the end of the Materials & Methods, listing the accession codes for data generated in this study and deposited in a public database (e.g. RNA-Seq data: Gene Expression Omnibus GSE39462, Proteomics data: PRIDE PXD000208 etc.) Please refer to our author guidelines for 'Data Deposition'.<br><br>Data deposition in a public repository is mandatory for:<br>a. Protein, DNA and RNA sequences<br>b. Macromolecular structures<br><del>c. Central biophysical data for small molecules</del>                                                                                             | Generated TCGA data (tRNA abundances, SDA, CNA, and DNA methylation): Synapse syn20640275 (www.synapse.org/tRNA_TCGA).<br>Hydro-tRNA and small RNA sequencing data of all five cell lines: Gene Expression Omnibus GSE137834 (https://www.ncbi.nlm.nih.gov/geo/query/acc.cgi?acc=GSE137834).<br>Hydro-tRNAseq data from HEK293 and HeLa has also been previously published (Benisty et al, 2019): ArrayExpress E-MTAB-8144. |
| 19. Deposition is strongly recommended for any datasets that are central and integral to the study; please consider the journal's data policy. If no structured public repository exists for a given data type, we encourage the provision of datasets in the manuscript as a Supplementary Document (see author guidelines under 'Expanded View' or in unstructured                                                                                                                                                                                                                                                                      | All datasets are deposited.                                                                                                                                                                                                                                                                                                                                                                                                 |
| 20. Access to human clinical and genomic datasets should be provided with as few restrictions as possible while respecting ethical obligations to the patients and relevant medical and legal issues. If practically possible and compatible with the individual consent agreement used in the study, such data should be deposited in one of the major public access-                                                                                                                                                                                                                                                                    | NA                                                                                                                                                                                                                                                                                                                                                                                                                          |
| 21. Computational models that are central and integral to a study should be shared without restrictions and provided in a machine-readable form. The relevant accession numbers or links should be provided. When possible, standardized format (SBML, CellML) should be used instead of scripts (e.g. MATLAB). Authors are strongly encouraged to follow the MIRIAM guidelines (see link list at top right) and deposit their model in a public database such as Biocompare (see link list at top right) or the Open Systems Biology Library (see link list at top right). If a public database is not available, it should be deposited | Scripts for analyzing tRNA data of TCGA: GitHub (https://github.com/hexavier/tRNA_TCGA).<br>Scripts for tRNA mapping: GitHub (https://github.com/hexavier/tRNA_mapping).                                                                                                                                                                                                                                                    |

### G- Dual use research of concern

|                                                                                                                                                                                                                                                                                               |    |
|-----------------------------------------------------------------------------------------------------------------------------------------------------------------------------------------------------------------------------------------------------------------------------------------------|----|
| 22. Could your study fall under dual use research restrictions? Please check biosecurity documents (see link list at top right) and list of select agents and toxins (APHIS/CDC) (see link list at top right). According to our biosecurity guidelines, provide a statement only if it could. | NA |
|-----------------------------------------------------------------------------------------------------------------------------------------------------------------------------------------------------------------------------------------------------------------------------------------------|----|
